# Supplementary material
Source: publisher figshare collection journal article supplement (https://frontiersin.figshare.com/ndownloader/files/31516370)
Supplement: Supplementary file [file 31516370]

**Supplementary Table 3:** Correlation analysis among the endogenous and muscle-derived normalised relative quantification values for the four myomiRs.

|                      | <b>miR-1</b>   | <b>miR-133a</b> | <b>miR-133b</b> | <b>miR-206</b> |
|----------------------|----------------|-----------------|-----------------|----------------|
| <b>EDL</b>           | -0.2802        | -0.2088         | -0.0110         | <b>0.6648</b>  |
| <b>Soleus</b>        | -0.2582        | -0.4890         | -0.3571         | -0.1868        |
| <b>TA</b>            | -0.3736        | -0.4505         | -0.3352         | <b>0.8352</b>  |
| <b>Gastrocnemius</b> | <b>-0.6703</b> | -0.3626         | -0.4066         | <b>0.7857</b>  |
| <b>Quadriceps</b>    | 0.0330         | 0.0824          | -0.1319         | <b>0.7033</b>  |

Correlation values were calculated with the Spearman method and are shown for each myomiR per muscle. Correlation values with p-values less than 0.05 are in bold text (see Table S4 for equivalent p-values).
